# Supplementary material for: Key contributors to variations in fish mercury within and among freshwater reservoirs in Oklahoma, USA
Source: Royal Society of Chemistry journal article supplement (doi:10.1039/c5em00495k), 2015-12-09
Supplement: c5em00495k2.xlsx [file c5em00495k2.xlsx]

## Sheet: OK_All_Lakes
Reservoir Name	THg in 14″Largemouth Bass	Year Created	Wetland Coverage	Quadrant	Area	Perimeter	Annual Rainfall	True Color	Apparent Color	Temperature	Dissolved Oxygen	DO Saturation	Summer Hypoxia	pH	Alkalinity	Specific Conductivity	Salinity	Resistivity	Redox Potential	Turbidity	Secchi Depth	Clarity	Pheophytin	Chlorophyll-a	Sulfate	Chloride	Phosphorus, Ortho	Phosphorus, Total	Nitrogen, Nitrate	Nitrogen, Kjeldahl	Nitrogen, Nitrite	Nitrogen, Ammonia	Trophic Index	Trophic Class	N:P Ratio
	(μg/g)				(km2)	(km)	(inch)	(standard unit)	(standard unit)	(°C)	(mg/L)	(%)	(%)		(mg/L)	(μS/m)	(ppt)	(kΩ·m)	(mV)	(NTU)	(cm)		(mg/m3)	(mg/m3)	(mg/L)	(mg/L)	(mg/L)	(mg/L)	(mg/L)	(mg/L)	(mg/L)	(mg/L)
Arbuckle	0.102782	1967	6.53e-05	SE	9.83355e+06	55837.9	39.8956	12	29	16.1656	6.31164	62.0869	57	7.77934	158.7	383.262	0.198197	2.62361	331.361	5	177	excellent	1.55429	8.02571	12.65	23.15	0.0404	0.0766	0.111	0.581	0.05	0.21	50	mesotrophic	26
Arcadia	0.23	1986	0	NE	7.79891e+06	36474.3	35.8344	24	122.5	15.7184	7.43724	72.2655	58	7.8944	137.36	411.108	0.203956	697.919	332.78	42	67	average	4.915	22.7237	28.15	26.76	0.0587	0.111818	0.164	0.654545	0.057	0.173	58	eutrophic	15
Atoka	0.356511	1964	0.00619736	SE	2.19344e+07	82472.3	43.7256	229.75	299.5	16.6485	7.4288	73.6333	0	7	16.55	90.8253	0.0479973	1932.72	342.775	115	17	poor	0.936667	4.865	48.3143	7.85714	0.045125	0.085375	0.1575	0.42125	0.05625	0.0575	58	eutrophic	11
Birch	0.869309	1977	2.56e-05	NE	4.49188e+06	40772.4	40.7197	66	241.333	14.2931	6.89217	63.4759	10	7.34892	43.9	192.228	0.0884337	960.577	283.807	10	88	good	3.36889	8.68556	16.8667	15.1889	0.026	0.0754	0.134444	0.766	0.05	0.204444	51	eutrophic	30
Boomer	0.349206	1932	0.000129865	NE	934532	9389.62	36.509	32.1667	53	16.6523	6.98269	68.2942	38	7.69019	98.3833	273.548	0.131731	3.75349	364.769	24	42	average	2.82778	8.74889	20.1	13.72	0.012	0.0335	0.05	0.631667	0.07	0.072	59	eutrophic	18
Broken Bow	0.626912	1970	0.0129164	SE	5.55534e+07	291657	53.3905	10.8571	29.6667	9.04475	5.21057	45.4617	44	6.19206	10	28.2801	-0.000425532	5118.57	389.816	3	274	excellent	0.48	2.58429	10	10	0.00585714	0.0125	0.262857	0.225	0.05	0.05	41	mesotrophic	27
Canton	0.264655	1948	0.00209799	NW	3.25566e+07	57133.8	27.8562	20.125	103	15.9103	8.20388	80.2433	0	8.03567	144	1510.75	0.792239	109.301	353.791	35	22	poor	2.93333	17.23	299.75	200	0.026125	0.079625	0.05	0.71125	0.05	0.055	64	hypereutrophic	18
Carl Albert	0.507564	1964	0.0215883	SE	728461	4796.65	51.308	54	54	13.6946	6.08542	57.9917	62	6.62125	11.6714	39.4542	0.00375	34.5733	390.5	14	90	good	1.72125	3.07	16.05	10	0.015	0.0495714	0.0685714	0.402857	0.05	0.148571	41	mesotrophic	16
Carl Blackwell	0.283644	1937	0.000129865	NE	1.38829e+07	82046.2	36.509	51.3333	230.875	15.4134	7.7417	73.7426	50	7.77745	133.258	381.74	0.193191	211.617	339.783	28	46	average	1.38375	13.8075	17.62	25.6273	0.0431667	0.0849231	0.131667	0.726923	0.0666667	0.229091	51	eutrophic	25
Cedar	0.464057	1937		SE				110.571	195	14.1375	4.015	37.3417	70	6.61792	19.5571	74.8875	0.0233333	29.1674	388.75	6	99	excellent	2.78	10.7	34.925	10	0.0315714	0.275429	0.115714	0.954286	0.05	1.18429	56	eutrophic	18
Clayton	0.690165	1935		SE						11.5883	7.395	71.1333		6.50667	13.875	80.1667	0.04	22467.2	52				2.24	7.10286	10	10		0.011375		0.89
Coalgate City	0.489272	1965	0.00126298	SE	1.59118e+06	12700.2	43.0362	250.125	369.5	15.2063	6.47657	60.46	71	7.11086	23.6625	73.2629	0.022	15.3565	439.086	92	26	poor	3.305	4.95667	51.1143	7.85714	0.061875	0.122625	0.13	0.80875	0.06375	0.11375	47	mesotrophic	13
Copan	0.275214	1983	0.00190094	NE	1.14695e+07	47686	40.5748	61.1	225	13.7831	9.19426	83.5	44	7.67741	89.92	257.113	0.121667	1597.2	298.463	46	32	average	3.62667	12.8867	18.1	10.45	0.0432	0.0744545	0.13	0.399091	0.052	0.062	60	eutrophic	10
Ellsworth	0.476163	1962	0.00237382	SW	2.14289e+07	65562	32.5237	29.0833	176.667	16.9924	7.22776	73.4447	0	8.04303	122.364	514.949	0.255526	337.582	305.775	31	27	poor	3.40571	11.3	104.014	22.5364	0.0739167	0.118818	0.243333	0.59	0.0508333	0.165	60	eutrophic	20
Elmer Thomas	0.426394	1939	0.00381665	SW	1.27844e+06	11613.5	32.3053	15.7778	70	14.0693	6.59125	61.275	76	7.32425	31.1333	90.965	0.02875	11.0585	368.725	2	175	excellent	2.13667	1.84778	11.8	8.37778	0.008	0.0287778	0.0711111	0.376667	0.05	0.11	39	oligotrophic	46
Eucha	0.159311	1952	0.00471849	NE	1.12657e+07	67143.3	46.2104	15.8333		11.7084	6.8956	62.276	71	7.7144	96.6	262.556	0.1232	1812.88	248.68	4	151	excellent	1.82556	8.73556	11.2667	9.46667	0.0575	0.138143	0.5	1.00286	0.05	0.616667	50	mesotrophic	71
Eufaula	0.25781	1964	0.0124753	SE	4.03149e+08	1.32175e+06	45.1804			17.52	7.66328	80.213	25	7.79463		424.383	0.212334	263.387	378.498	23	43	poor	0.1	5.5									48	mesotrophic	20
Fort Gibson	0.111643	1953	0.00651752	NE	7.4415e+07	330453	45.8102	42.7778	114	17.0792	7.71458	78.0083	82	8.15979	89.3	474.165	0.237083	523.645	311.25	7	96	good	7.68857	20.6314	26.025	10.02	0.0767778	0.1394	0.422222	0.746	0.0533333	0.13	60	eutrophic	11
Fort Supply	0.39597	1942	0.0006366	NW	6.74203e+06	19047.2	23.8818	51.0833	264.167	14.0808	8.61177	79.8031	0	7.93906	174.275	288.603	0.138437	1356.62	281.677	59	26	fair to poor	4.67125	16.2975	120.625	164.215	0.0444167	0.11025	0.0908333	0.795	0.0508333	0.0616667	59	eutrophic	11
Frederick	0.857963	1974	0.000979738	SW	4.16621e+06	22407.7	29.5052	61.25	323.5	15.2076	8.73187	85.2467	36	8.02747	142.8	1056.16	0.5508	98.4058	389.413	59	26	poor	2.17	9.26333	36.9714	33.1429	0.062	0.0746667	0.145	0.588889	0.05875	0.06625	57	eutrophic	21
Fuqua	0.138	1962	0.000556786	SW	3.99203e+06	22347.6	36.6639	27.7273	107	15.646	8.22867	79.6467	40	8.15347	187.455	580.613	0.295333	481.288	284.653	14	87	average	0.981	7.543	42.0375	47.175	0.0173636	0.0361667	0.053	0.545833	0.051	0.0922222	57	eutrophic	27
Grand	0.107812	1940	0.00257323	NE	1.54845e+08	547694	44.2969	37.3333	116	14.0434	6.62163	60.1546	59	7.57137	92.0556	311.572	0.150318	971.186	292.009	14	63	average to good	3.03125	8.6025	26.1	9.9	0.130667	0.229182	0.741111	0.709091	0.0566667	0.1975	60	eutrophic	15
Greenleaf	0.270159	1939	0.0158155	NE	2.85073e+06	23108.8	45.6593	76.25	108.25	16.1649	5.58686	53.9745	57	7.34529	46.025	155.761	0.0680392	1318.25	318.588	12	67	good	3.32714	16.6086	26.975	10	0.026625	0.094125	0.1375	1.035	0.05	0.622857	54	eutrophic	42
Guthrie	0.115374	1919	2.1e-05	NW	484708	4804.71	35.3179	19.3636	129.4	16.7741	7.10385	70.6333	0	8.16538	221.81	714.192	0.368974	1.41062	412.641	19	52	average to good	3.875	15.3	16.1571	90.06	0.0192727	0.0705455	0.0572727	0.975455	0.05	0.0854545	61	hypereutrophic	15
Heyburn	0.825992	1950	1.13e-05	NE	3.75955e+06	36589.4	41.1139	150.9	247	13.7252	7.93716	71.5593	60	7.1858	40.31	230.156	0.107654	847.247	338.272	53	59	fair	2.56625	6.20125	21.1833	21.6	0.0447	0.0889091	0.088	0.515455	0.062	0.092	49	mesotrophic	13
Hudson	0.122425	1964	0.0038704	NE	3.82789e+07	131690	44.693	20	110.4	16.2232	8.85417	84.4543	50	7.70894	98.3545	248.519	0.112119	557.5	350.881	11	66	average	4.14615	13.5931	21.3333	7.76	0.0514545	0.0858182	0.223636	0.398182	0.0563636	0.057	51	eutrophic	60
Hugo	0.537452	1974	0.0310998	SE	4.9742e+07	164722	48.337	94.5	250	17.5404	7.64487	76.8167	0	6.81936	23.52	68.0808	0.0212821	3350.85	367.397	61	25	poor	3.04778	9.01889	18.9833	7.61	0.0397	0.0883	0.066	0.387	0.06	0.054	54	eutrophic	14
Hulah	0.295154	1951	0.000451985	NE	1.24544e+07	64200.7	39.4897	53	246.25	16.3663	8.09143	78.4804	0	7.79619	118.03	322.007	0.159821	756.159	332.986	78	17	poor	7.14333	9.85167	25.7167	9	0.0509	0.0834	0.113	0.461	0.065	0.081	52	eutrophic	13
Kaw	0.394638	1976	0.0430211	NE	6.56281e+07	187935	37.9546	61.3	192.25	13.2765	7.52782	66.88	24	7.77982	125.71	889.918	0.449818	381.746	221.855	27	35	poor	1.20875	2.85625	67.7143	103.655	0.1738	0.195455	0.929	0.559091	0.06	0.101	53	eutrophic	9
Keystone	0.384299	1964	0.00124785	NE	9.69456e+07	443458	40.7891	74.8571	211.75	16.6754	6.59425	63.2722	22	7.76109	115.133	2351.1	1.25929	199.378	321.171	125	24	poor	1.65714	5.93143	105.014	280.008	0.155143	0.193286	0.523571	0.777857	0.0971429	0.204615	59	eutrophic	8
Lawtonka	0.210031	1905	0.00381665	SW	9.581e+06	27690	32.3053	17.1667	120.167	15.4089	6.99973	66.0822	66	7.84192	115.508	414.914	0.205753	397.658	105.011	7	130	excellent	1.79	17.6114	54.3	12.0909	0.0360833	0.06625	0.129167	0.575833	0.05	0.198333	56	eutrophic	22
Lloyd Church	0.779328	1964	0.0171292	SE	691490	5619.37	48.8678	64.6667	43	15.5742	6.18885	59.3769	62	6.60346	12.95	38.5615	0.00461538	29.764	416.346	14	64	good	1.735	2.7825	19.35	10	0.0165	0.0405	0.115	0.406667	0.05	0.123333	45	mesotrophic	12
McAlester	0.303066	1930	0.000791008	SE	6.01622e+06	29174.1	43.2765	220.455	276	15.9503	7.29516	71.5113	42	7.18258	14.8818	98.6339	0.0364516	2432.9	400.516	34	38	average	0.9825	6.73125	48.6667	9.2	0.0721818	0.138167	0.145455	0.615833	0.0554545	0.091	54	eutrophic	15
McMurtry	0.655798	1971	0.000129865	NE	4.82974e+06	31804.5	36.509	53.25	155.25	16.3437	7.21662	70.9088	50	7.90103	143	358.896	0.182985	443.146	316.559	20	52	average	1.12375	7.80375	16.16	12.9636	0.0225	0.0391667	0.134167	0.570833	0.055	0.155455	51	eutrophic	49
Murray	0.150597	1937	0.00100567	SE	2.20884e+07	129962	37.9158	16	85.75	15.2799	7.77125	76.1073	48	7.94392	107.162	308.134	0.149794	1153.78	324.74	6	141	excellent	0.5625	1.48125	16.1	12.04	0.012875	0.03125	0.0675	0.3725	0.0575	0.05	37	oligotrophic	79
Nanih Waiya	0.371822	1958	0.0215883	SE	425643	3231.99	51.308	34.3	125.5	16.6404	6.8344	68.128	42	7.0668	34.23	88.292	0.0256	12.7611	419.32	9	98	average	0.862727	6.00182	10.3333	7.5	0.0149	0.0448	0.052	0.529	0.051	0.222	45	mesotrophic	18
New Spiro	0.0603228	1960	0.0249894	SE	1.05592e+06	8374.92	46.8751	40.7143	112.25				33		27.1143					18	47	good	9.285	46.7863	14.6667	8.85	0.0571429	0.181	0.172857	1.37571	0.06	0.315714	68	hypereutrophic	11
Oolagah	0.176096	1963	0.00174519	NE	1.17243e+08	348019	41.9606	21.5	59	16.8765	7.83226	76.2405	0	7.81571	107.688	330.618	0.157976	968.641	304.476	39	33	poor	1.38429	6.77	28.65	10.175	0.04025	0.06075	0.1175	0.33125	0.05	0.07625	51	eutrophic	14
Ozzie Cobb	0.773636	1958		SE				79.5	242.333	17.2983	6.30708	63.4958	50	6.55083	16.71	80.025	0.025	16.6407	385.833	12	56	average	5.258	16.053	13.45	8	0.0157	0.0616	0.0677778	0.644	0.05	0.118	59	eutrophic	17
Pine Creek	1.12243	1969	0.00666792	SE	1.91358e+07	136842	50.9939	84.0714	188.25	16.013	5.68505	53.8583	71	6.11301	26.2286	47.4068	0.0108738	4263.04	377.866	13	67	good	2.435	9.23875	15.9429	6.53846	0.0215714	0.0535714	0.103571	0.548571	0.0521429	0.226429	58	eutrophic	16
Ponca	0.240772	1935	0.0825334	NE	3.04416e+06	23425.6	37.5184	30.6667	136.333	12.5392	7.4811	67.1123	35	7.72014	136.633	334.401	0.163288	499.548	273.151	11	78	good	2.53556	10.7433	18.7167	9.05556	0.0618889	0.1149	0.214444	0.645	0.05	0.208889	57	eutrophic	20
Quanah Parker	0.7128	1936		SW						13.6018	7.42769	67.0538		7.56308		202.708	0.0969231	6591.06	194.446				0.681667	5.01167	10.3333	10		0.0131667		0.818333
Raymond Gary	0.197943	1956	0.011605	SE	1.10324e+06	14887.6	48.8541	35.875	180	18.2104	6.1352	62.968	67	6.89	49.7125	245.236	0.1132	7.76344	380.8	11	55	average	3.33909	11.87	13.52	57.15	0.011375	0.06425	0.0625	0.40375	0.05	0.08625	55	eutrophic	17
Kerr	0.289825	1970	0.0258157	SE	1.93049e+08	544571	46.5422	55.2222	250	16.6316	8.58776	86.7449	0	7.77163	103.211	649.533	0.333878	1.782	389.224	30	57	fair	5.73375	10.8163	60.9	125.678	0.0868889	0.164444	0.408889	0.566667	0.0511111	0.0666667	54	eutrophic	9
Sardis	0.480785	1982	0.0115071	SE	5.89045e+07	147000	50.3993	42.5	111.25	15.7197	8.04387	78.0903	44	6.70468	16.81	58.1871	0.0177419	5000.58	387.881	16	81	average	1.36727	6.68091	10.7333	7.5	0.0178	0.0396	0.067	0.246	0.052	0.063	52	eutrophic	16
Shawnee Twin #1	0.537127	1935	0.000159357	SE	3.6713e+06	23584.8	37.8468	35.9167	108.286	14.7541	9.04036	85.6643	31	7.73875	77.725	257.379	0.121964	413.229	357.346	13	103	average	0.84	21.3	10.9833	10.9	0.0100833	0.0185	0.0708333	0.4075	0.0508333	0.0858333	46	mesotrophic	30
Shawnee Twin #2	0.482658	1960	0.000159357	SE	1.92011e+06	12939.3	37.8468	45.4167	151.167	16.4922	7.252	70.5145	45	7.71364	75.2167	241.095	0.113818	262.105	370.862	12	80	good	1.65625	4.24125	14.1714	9.51667	0.0113333	0.0301667	0.0808333	0.55	0.05	0.0716667	52	eutrophic	36
Skiatook	0.396918	1972	8.15e-05	NE	4.25753e+07	181187	40.5135	28	215.5	15.1203	6.17609	58.9339	65	7.43974	67.41	264.255	0.123391	1103.22	289.739	21	82	good	1.23111	3.50778	15.15	24.8	0.0161	0.0561	0.156	0.43	0.054	0.17	47	mesotrophic	39
Sooner	0.118158	1972	0.0428267	NE	1.99558e+07	69397.5	38.5172	10.3333	59	14.1377	7.46809	69.0872	52	7.92702	121.388	1902.11	1.00404	153.583	282.064	6	115	excellent	0.4775	4.30375	135	407.889	0.008	0.02	0.06375	0.463	0.04875	0.0577778	46	mesotrophic	38
Spavinaw	0.130379	1924	0.00471849	NE	6.39567e+06	27460.5	46.2104	11		13.9977	6.84422	62.7036	67	7.72349	88.9167	222.313	0.104634	856.447	301.741	8	65	average	1.737	15.398	9.31667	9.25	0.0541667	0.148	0.313333	0.811667	0.05	0.425	59	eutrophic	67
Stanley Draper	0.436467	1962	0.00272328	SE	1.06699e+07	54605.7	37.1967	120.125	146				52		24.9					7	133	good	0.384	2.732	22.4857	7.85714	0.01825	0.030125	0.18875	0.27625	0.05	0.05	40	oligotrophic	20
Talawanda #1	0.259837	1902		SE				64.8182	97.2	14.3393	6.38733	60.9567	44	6.92633	36.9636	107.443	0.0406667	10.0893	356.9	3	153	excellent	0.815	4.84833	15.9833	8.57143	0.00709091	0.0281818	0.0654545	0.905455	0.05	0.336	47	mesotrophic	39
Talawanda #2	0.362836	1924		SE				31.9167	71.4	14.8054	6.57268	63.2732	50	6.9978	26.8091	104.927	0.0390244	10.1084	384.073	6	123	excellent	1.04625	2.68	14.4857	8.75	0.01375	0.0225	0.0772727	0.4175	0.05	0.189	44	mesotrophic	31
Tenkiller Ferry	0.298433	1953	0.00555232	NE	5.45249e+07	216425	47.8056	11.6667	99.4286	14.9418	5.66676	53.1853	50	7.60265	84.1091	287.453	0.138529	941.605	294.926	14	56	average	0.35	4.375	10.5833	7.18	0.0565833	0.10425	0.428333	0.545833	0.0516667	0.244545	58	eutrophic	51
Texoma	0.187673	1944	0.000910238	SE	3.4167e+08	797199	41.0141	12.8333		17.1279	6.29561	64.6173	33	7.83865	107.06	1884.2	1.00046	78.2712	316.647	9	87	good	3.285	9.1325	201.286	309.714	0.0345	0.0868571	0.138	0.635714	0.05	0.103333	59	eutrophic	15
Thunderbird	0.189416	1965	0.00272328	SE	2.25641e+07	91219	37.1967	25.75	92.25	13.6657	6.36303	60.4947	47	8.00513	164.545	419.917	0.2075	912.57	290.776	28	53	average	2.84333	14.1333	13.4857	19.325	0.156727	0.187333	0.24375	1.3225	0.05	0.579091	57	eutrophic	13
Tom Steed	0.171409	1975	0.00858108	SW	2.50871e+07	45892.3	29.5948	30	223.667	15.4647	9.03158	85.0772	25	8.16456	126	883.665	0.454737	232.12	317.351	30	57	average	9.30375	20.7275	134.6	131.625	0.035	0.07275	0.0614286	0.645	0.0557143	0.05	55	eutrophic	12
Wayne Wallace	0.731676	1969	0.0171292	SE	422511	4540.48	48.8678	66.2292	150.889	15.375	6.49605	62.8737	60	6.39316	15.704	58.4026	0.015	2877.27	373.684	6	115	excellent	2.21538	6.78231	228.415	8.64583	0.0110625	0.033931	0.069697	0.445	0.0512121	0.118718	63	hypereutrophic	74
Wes Watkins	0.187218	1997	0.000159357	NE	4.57975e+06	27799.2	37.8468	34.5632	124.316	14.8498	7.87534	73.7552	45	7.74603	94.7561	285.224	0.137586	296.746	374.914	18	65	good	2.47403	9.27075	11.6796	9.62439	0.0100345	0.030514	0.134595	0.735794	0.0508108	0.0988406	56	eutrophic	25
Wister	0.659065	1949	0.0235218	SE	1.36677e+07	93303.3	50.7247	121.547	138.75	16.4697	7.32287	73.2766	30	6.90032	22.2097	82.7319	0.0254255	1158.84	380.436	17	54	average	6.38592	16.5096	22.9692	8.675	0.034589	0.0716518	0.0973171	0.542679	0.05	0.0595918	57	eutrophic	9
McGee Creek	0.636594	1987	0.00541166	SE	2.07034e+07	152458	46.0204			12.5825	5.02437	46.0901	76	6.56521		57.1282	0.0173239	4811.54	272.831	4	149	excellent											46	mesotrophic	30
